# Supplementary material for: Two organic–inorganic hybrid polyoxovanadates as reusable catalysts for Knoevenagel condensation
Source: Royal Society of Chemistry journal article supplement (doi:10.1039/c8nj06460a), 2019-01-01
Supplement: c8nj06460a1.pdf [file c8nj06460a1.pdf]

# Supporting Information for Two Organic-Inorganic Hybrid Polyoxovanadates as Reusable Catalysts for Knoevenagel Condensation

Chunxia Li,<sup>a</sup> Dandan Zhong,<sup>a</sup> Xianqiang Huang,<sup>\*a</sup> Guodong Shen,<sup>a</sup> Qiang Li,<sup>a</sup> Jiyuan Du,<sup>a</sup> Qianli Li,<sup>a</sup> Suna Wang,<sup>a</sup> Jikun Li<sup>\*b</sup>  
and Jianmin Dou<sup>\*a</sup>

## Table of contents

1. Table S1 The bond distances and bond angles of compounds 1-2.
2. Table S2 The hydrogen bond geometry of compounds 1-2.
3. Table S3 Bond valance sum calculations for compounds 1-2.
4. The characterization data of Knoevenagel products
5. Figure S1 The FT-IR spectrum data for compound 1
6. Figure S2 The FT-IR spectrum data for compound 2
7. Figure S3 The powder XRD pattern data for compound compound 1
8. Figure S4 The powder XRD pattern data for compound compound 2
9. Figure S5 Thermogravimetric analysis curves of compound 1.
10. Figure S6 Thermogravimetric analysis curves of compound 2
11. The NMR spectra
12. References

**Table S1.** Selected bond distances(Å) and bond angles (°) for compounds **1-2**

| Compound 1                                                                                               |            |                     |            |
|----------------------------------------------------------------------------------------------------------|------------|---------------------|------------|
| Ni(1)-N(3)#1                                                                                             | 2.083(13)  | Ni(1)-N(3)          | 2.083(13)  |
| Ni(1)-N(3)#2                                                                                             | 2.083(13)  | Ni(1)-N(3)#3        | 2.083(13)  |
| Ni(1)-O(13)                                                                                              | 2.164(7)   | Ni(1)-N(4)          | 2.096(13)  |
| Ni(1)-O(13)#2                                                                                            | 2.164(7)   | Ni(2)-O(2)          | 2.076(6)   |
| Ni(2)-O(4)                                                                                               | 2.056(7)   | Ni(2)-O(5)          | 2.093(5)   |
| Ni(2)-O(3)#3                                                                                             | 2.077(5)   | Ni(2)-O(5)#3        | 2.093(5)   |
| V(1)-O(6)                                                                                                | 1.610(6)   | V(2)-O(9)           | 1.601(7)   |
| V(1)-O(7)                                                                                                | 1.824(4)   | V(2)-O(8)#3         | 1.829(5)   |
| V(3)-O(10)                                                                                               | 1.704(5)   | V(4)-O(2)           | 1.642(6)   |
| V(3)-O(10)#5                                                                                             | 1.704(5)   | V(4)-O(1)#3         | 1.798(5)   |
| N(3)#1-Ni(1)-N(3)#2                                                                                      | 145.0(7)   | N(3)-Ni(1)-N(3)#3   | 145.0(7)   |
| N(3)#1-Ni(1)-N(4)#1                                                                                      | 91.8(5)    | N(3)#1-Ni(1)-N(4)#3 | 88.2(5)    |
| O(4)-Ni(2)-O(3)                                                                                          | 87.2(2)    | O(2)-V(4)-O(1)#3    | 103.4(2)   |
| O(3)#3-Ni(2)-O(3)                                                                                        | 90.5(3)    | O(2)-V(4)-O(1)      | 103.4(2)   |
| O(4)-Ni(2)-O(2)                                                                                          | 176.4(3)   | O(1)#3-V(4)-O(1)    | 96.1(3)    |
| O(3)#3-Ni(2)-O(2)                                                                                        | 90.3(2)    | O(2)-V(4)-O(11)#3   | 99.4(2)    |
| O(6)-V(1)-O(7)                                                                                           | 105.9(3)   | O(1)#3-V(4)-O(11)#3 | 154.3(2)   |
| O(6)-V(1)-O(8)                                                                                           | 102.9(3)   | O(1)-V(4)-O(11)#3   | 89.7(2)    |
| O(9)-V(2)-O(8)                                                                                           | 103.6(2)   | O(10)-V(3)-O(11)    | 97.3(2)    |
| O(9)-V(2)-O(11)                                                                                          | 99.3(2)    | O(10)-V(3)-O(11)#5  | 96.9(2)    |
| Symmetry codes: #1 -x, y, -z+1; #2 -x, -y+1, -z+1; #3 x, -y+1, z; #4 -x+1, -y+1, -z+2; #5 -x+1, y, -z+2. |            |                     |            |
| Compound 2                                                                                               |            |                     |            |
| V(1)-O(2)                                                                                                | 1.615(3)   | V(2)-O(6)           | 1.611(3)   |
| V(1)-O(1)                                                                                                | 1.684(2)   | V(2)-O(3)#1         | 1.808(3)   |
| V(1)-O(3)                                                                                                | 1.771(3)   | V(3)-O(7)           | 1.607(3)   |
| V(1)-O(4)                                                                                                | 1.771(3)   | V(3)-O(1)           | 2.058(3)   |
| V(3)-N(7)                                                                                                | 2.109(4)   | V(3)-N(3)           | 2.119(4)   |
| V(3)-N(1)                                                                                                | 2.112(4)   | V(3)-N(5)           | 2.120(4)   |
| O(2)-V(1)-O(1)                                                                                           | 108.27(14) | O(1)-V(1)-O(4)      | 110.33(13) |
| O(5)-V(2)-O(4)                                                                                           | 108.02(16) | O(5)-V(2)-O(6)      | 108.6(2)   |
| O(2)-V(1)-O(4)                                                                                           | 108.11(15) | O(5)-V(2)-O(3)#1    | 109.99(16) |
| O(7)-V(3)-O(1)                                                                                           | 178.09(15) | N(7)-V(3)-N(1)      | 92.07(14)  |
| O(7)-V(3)-N(5)                                                                                           | 93.33(16)  | N(1)-V(3)-N(5)      | 173.46(14) |
| Symmetry codes: #1 -x+2, -y+2, -z                                                                        |            |                     |            |

**Table S2.** Hydrogen-bonding geometry (Å, °) for compounds **1–2**.

| D–H···A        | <i>d</i> (D–H) | <i>d</i> (H···A) | <i>d</i> (D···A) | ∠DHA   | Symmetry codes       |
|----------------|----------------|------------------|------------------|--------|----------------------|
| compound 1     |                |                  |                  |        |                      |
| O3–H3B... O8   | 0.847          | 1.964            | 2.741            | 151.93 | -x+1/2, y+1/2, -z+2  |
| O3–H3C... O13  | 0.850          | 2.363            | 3.200            | 168.34 |                      |
| O4–H4D... O10  | 0.850          | 1.870            | 2.713            | 171.02 | x-1/2, y+1/2, z      |
| O5–H5A... O14  | 0.850          | 2.449            | 3.048            | 128.14 | -x+1/2, -y+3/2, -z+2 |
| O5–H5A... O5   | 0.850          | 2.503            | 2.940            | 112.92 | x, -y+1, z           |
| O5–H5A... O9   | 0.850          | 2.599            | 3.078            | 116.86 |                      |
| O5–H5D... O5   | 0.850          | 1.996            | 2.839            | 171.37 | -x+1/2, -y+3/2, -z+2 |
| O5–H5E... O11  | 0.850          | 1.876            | 2.720            | 171.50 | -x+1/2, y+1/2, -z+2  |
| O13–H13... O6  | 0.850          | 2.360            | 3.163            | 157.72 | -x+1/2, -y+1/2, -z+2 |
| O14–H14C... O1 | 0.850          | 1.834            | 2.680            | 173.43 |                      |
| O14–H14D... O3 | 0.850          | 1.915            | 2.761            | 173.25 |                      |
| compound 2     |                |                  |                  |        |                      |
| O8–H8C... O2   | 0.850          | 1.982            | 2.815            | 166.14 | x, y-1, z            |
| O8–H8D... O5   | 0.850          | 2.072            | 2.905            | 166.57 | -x+2, -y+1, -z       |

**Table S3.** Bond valance sum calculations for compounds **1–2**.

|          |                      |      |      |      |      |
|----------|----------------------|------|------|------|------|
| <b>1</b> | <b>V site</b>        | V1   | V2   | V3   | V4   |
|          | <b>BVS</b>           | 4.97 | 5.03 | 4.92 | 4.98 |
|          | <b>assigned O.S.</b> | 5    | 5    | 5    | 5    |
| <b>2</b> | <b>V site</b>        | V1   | V2   | V3   |      |
|          | <b>BVS</b>           | 5.22 | 4.29 | 4.20 |      |
|          | <b>assigned O.S.</b> | 5    | 5    | 4    |      |

**The characterization data of Knoevenagel products**

Entry 1. 2-benzylidenemalononitrile.

White solid, m.p. 75-77 °C, (lit.<sup>1</sup> 85 °C); <sup>1</sup>H NMR (500 MHz, CDCl<sub>3</sub>): δ 7.91 (d, *J* = 7.5 Hz, 2H), 7.79 (s, 1H), 7.64 (t, *J* = 7.5 Hz, 1H), 7.55 (t, *J* = 7.5 Hz, 2H); <sup>13</sup>C NMR (125 MHz, CDCl<sub>3</sub>): δ 160.06, 134.78, 131.08, 130.88, 129.79, 113.84, 112.67, 83.08.

Entry 2. 2-(4-chlorobenzylidene)malononitrile.

White solid, m.p. 166-168 °C, (lit.<sup>2</sup> 167-168 °C); <sup>1</sup>H NMR (500 MHz, CDCl<sub>3</sub>): δ 7.78 (d, *J* = 8.5 Hz, 2H), 7.72 (s, 1H), 7.69 (d, *J* = 8.5 Hz, 2H); <sup>13</sup>C NMR (125 MHz, CDCl<sub>3</sub>): δ 158.44, 133.11, 131.83, 129.96, 129.66, 113.46, 112.34, 83.54.

Entry 3. 2-(4-bromobenzylidene)malononitrile.

White solid, m.p. 164-166 °C, (lit.<sup>2</sup> 162 °C); <sup>1</sup>H NMR (500 MHz, CDCl<sub>3</sub>): δ 7.86 (d, *J* = 8.5 Hz, 2H), 7.74 (s, 1H), 7.53 (d, *J* = 8.5 Hz, 2H); <sup>13</sup>C NMR (125 MHz, CDCl<sub>3</sub>): δ 158.42, 141.30, 131.98, 130.22, 129.40, 113.57, 112.47, 83.49.

Entry 4. 2-(4-nitrobenzylidene)malononitrile.

Yellow solid, m.p. 149-151 °C, (lit.<sup>1</sup> 159 °C); <sup>1</sup>H NMR (500 MHz, CDCl<sub>3</sub>): δ 8.39 (d, *J* = 8.0 Hz, 2H), 8.08 (d, *J* = 8.0 Hz, 2H), 7.89 (s, 1H); <sup>13</sup>C NMR (125 MHz, CDCl<sub>3</sub>): δ 156.98, 150.51, 135.92, 131.45, 124.80, 112.77, 111.73, 87.71.

Entry 5. 2-(4-methylbenzylidene)malononitrile.

White solid, m.p. 136-137 °C, (lit.<sup>3</sup> 131 °C); <sup>1</sup>H NMR (500 MHz, CDCl<sub>3</sub>) δ 7.82 (d, *J* = 7.5 Hz, 2H), 7.72 (s, 1H), 7.34 (d, *J* = 8.0 Hz, 2H), 2.46 (s, 3H); <sup>13</sup>C NMR (125 MHz, CDCl<sub>3</sub>): δ 164.96, 159.00, 133.60, 124.17, 115.27, 114.57, 113.48, 78.74, 55.95.

Entry 6. 2-(4-methoxybenzylidene)malononitrile.

White solid, m.p. 114 °C, (lit.<sup>4</sup> 119 °C); <sup>1</sup>H NMR (500 MHz, CDCl<sub>3</sub>): δ 7.92 (d, *J* = 8.5 Hz, 2H), 7.66 (s, 1H), 7.02 (d, *J* = 8.5 Hz, 2H), 3.92 (s, 3H); <sup>13</sup>C NMR (125 MHz, CDCl<sub>3</sub>): δ 164.84, 158.88, 133.49, 124.05, 115.16, 114.45, 113.37, 78.62, 55.83.

Entry 7. 2-(2-bromobenzylidene)malononitrile.

White solid, m.p. 87-88 °C; <sup>1</sup>H NMR (500 MHz, CDCl<sub>3</sub>): δ 8.23 (s, 1H), 8.13 (d, *J* = 7.5 Hz, 1H), 7.75 (d, *J* = 7.5 Hz, 1H), 7.48 (m, 2H); <sup>13</sup>C NMR (125 MHz, CDCl<sub>3</sub>): δ 158.88, 135.10, 134.15, 130.94, 129.96, 128.50, 126.60, 113.26, 111.94, 86.19.

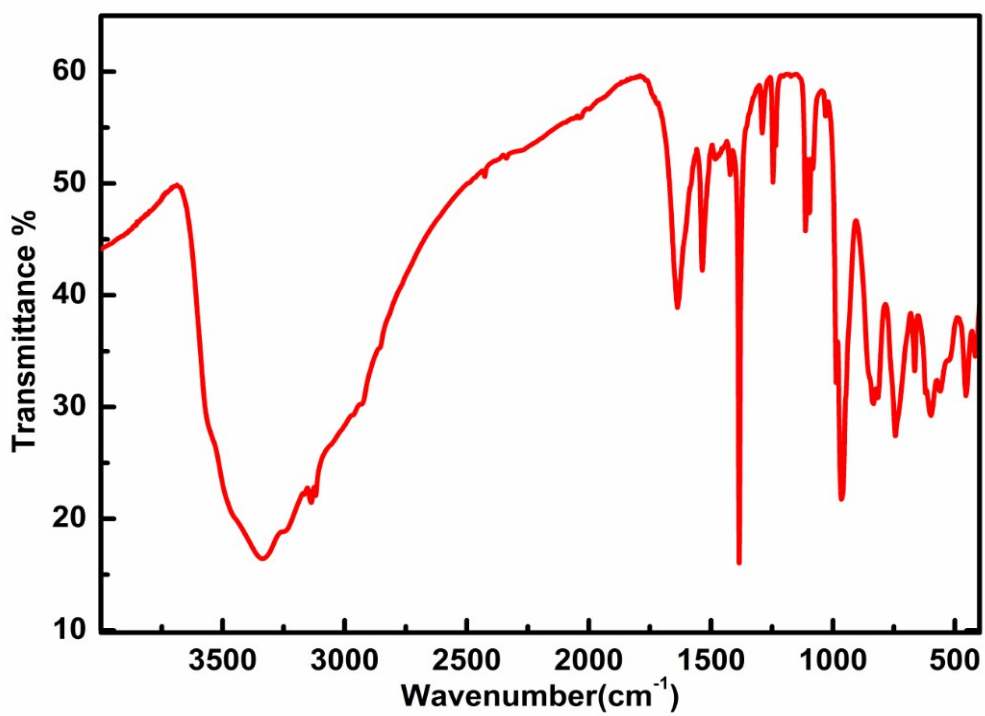

Figure S1. The IR spectrum of compound 1.

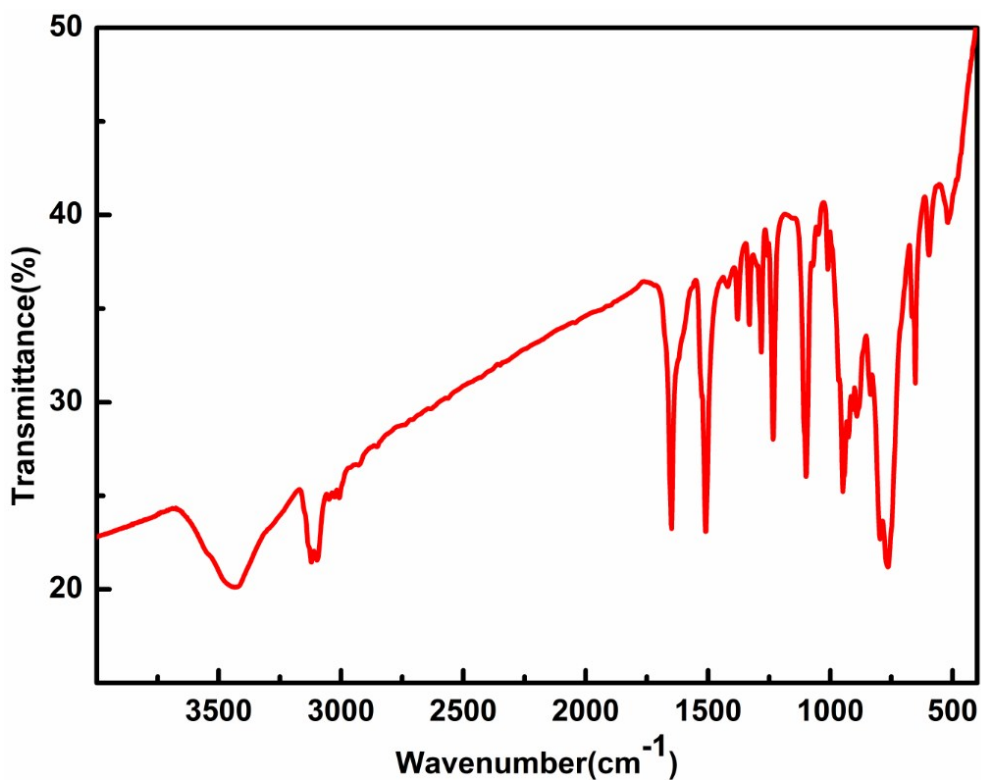

Figure S2. The IR spectrum of compound 2.

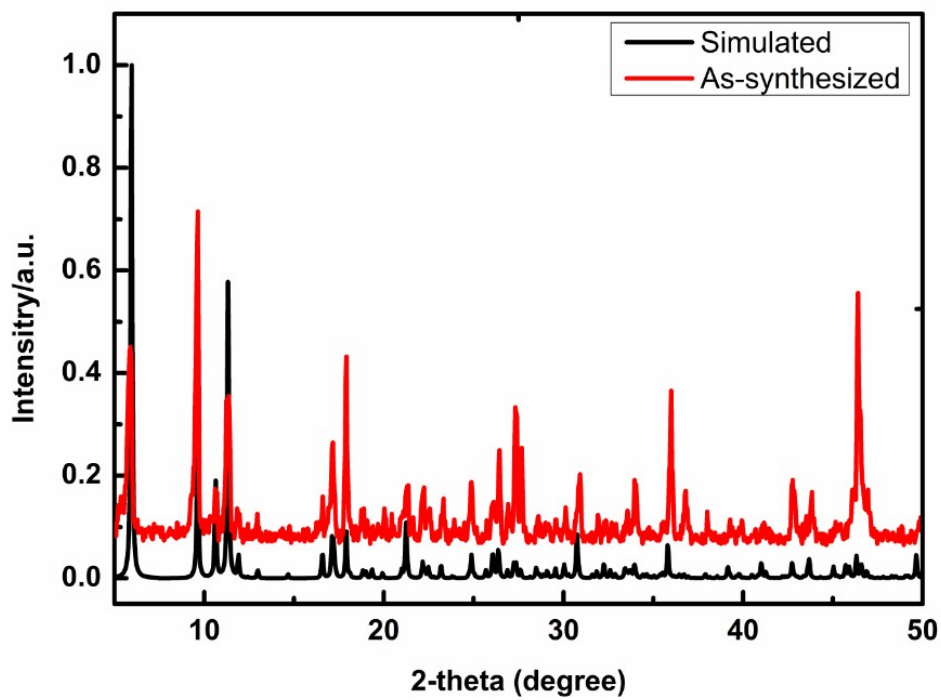

Figure S3. The PXRD spectrum of compound 1

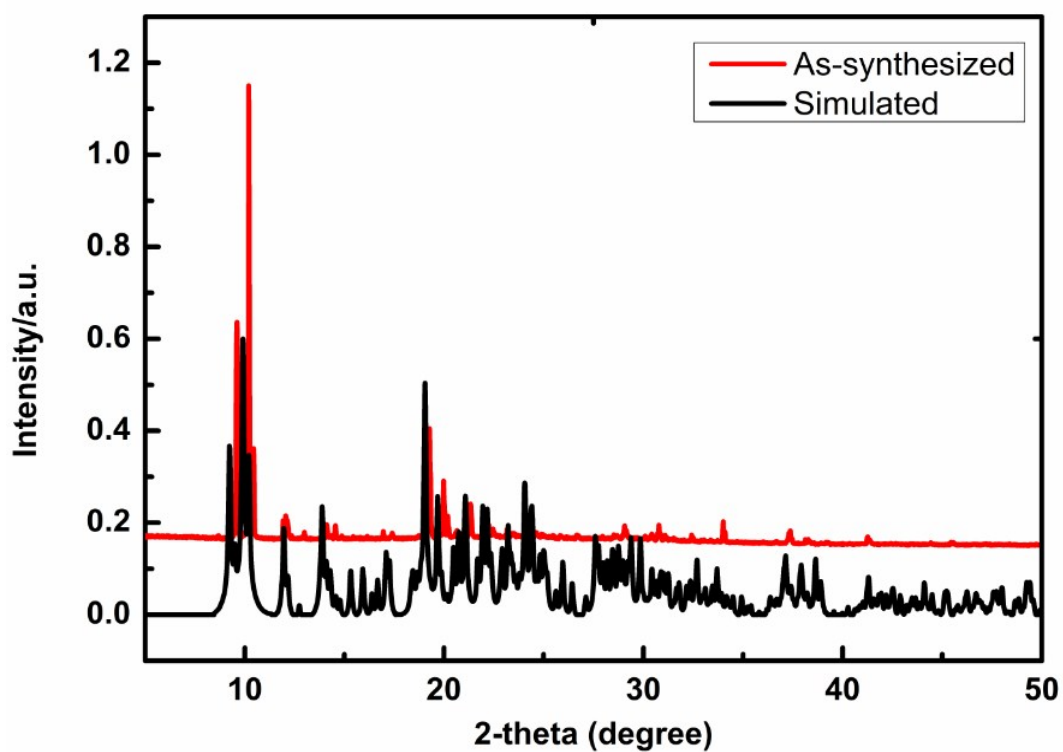

Figure S4. The PXRD spectrum of compound 2.

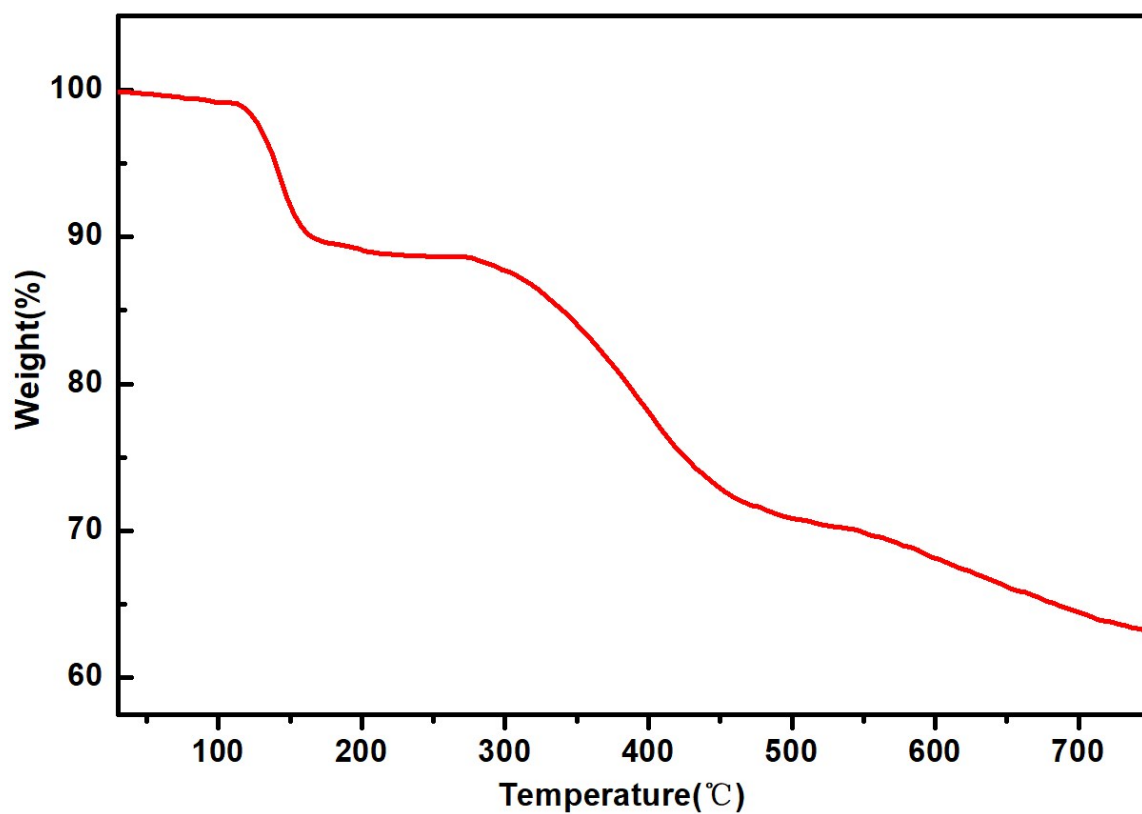

Figure S5 Thermogravimetric analysis curve of compound 1

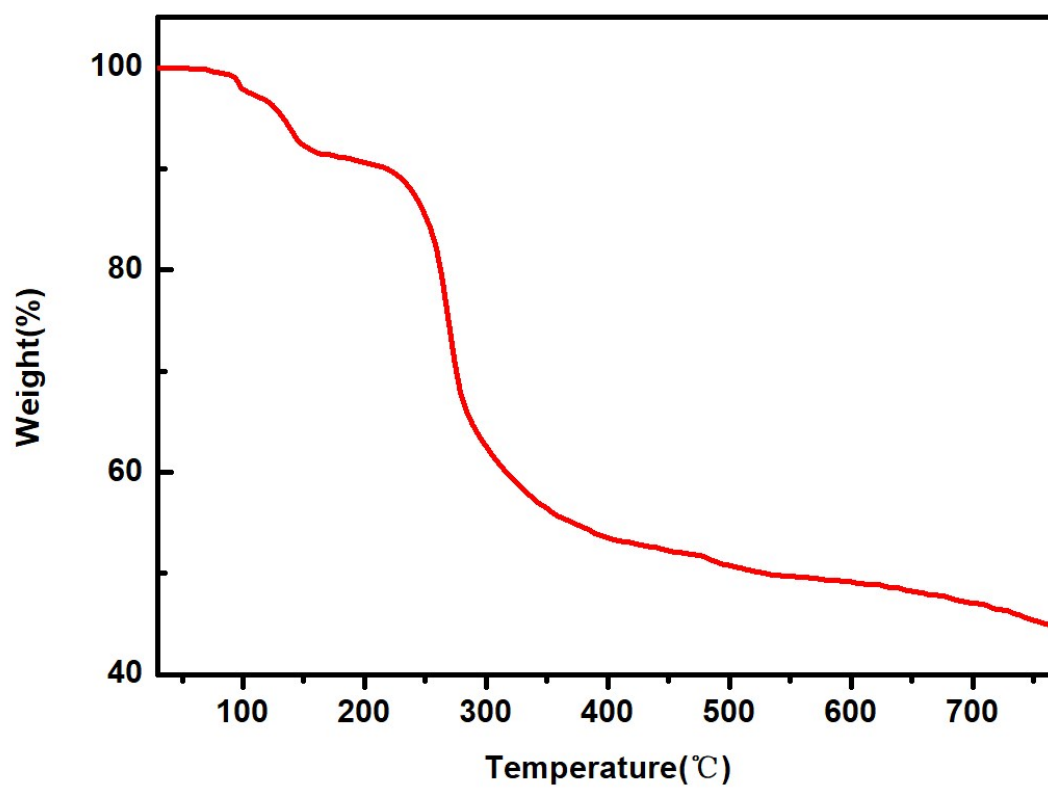

Figure S6 Thermogravimetric analysis curve of compound 2

## The NMR spectra

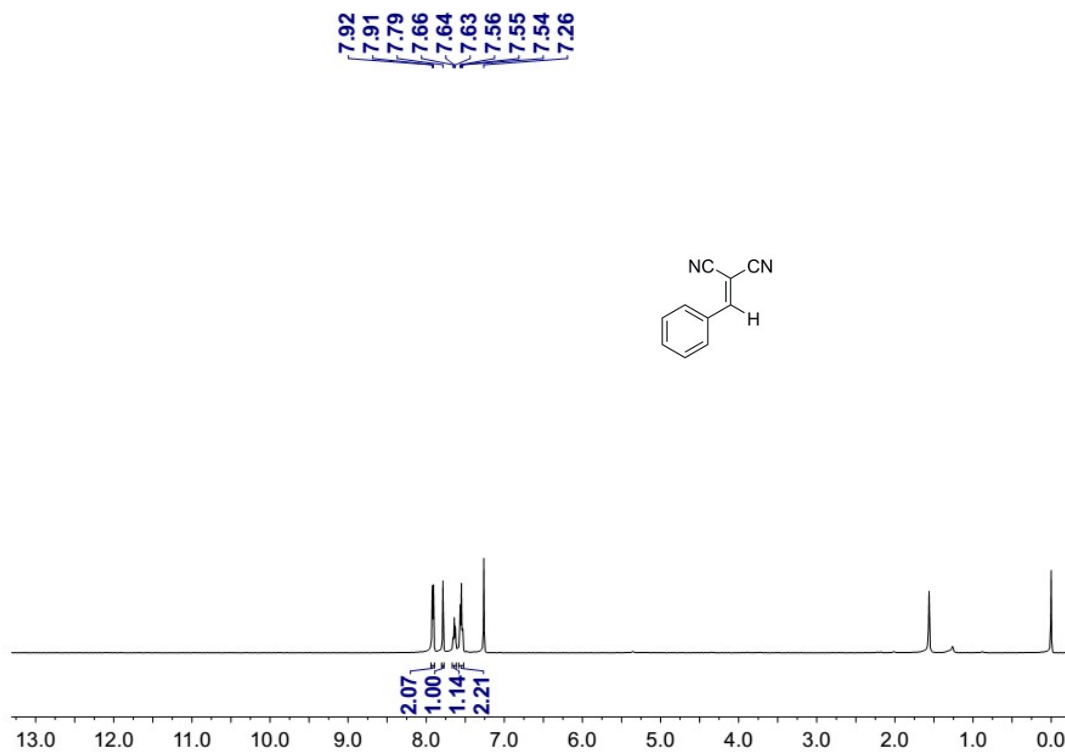

Figure S7. <sup>1</sup>H NMR spectrum of 2-benzylidenemalononitrile (entry 1) in CDCl<sub>3</sub>.

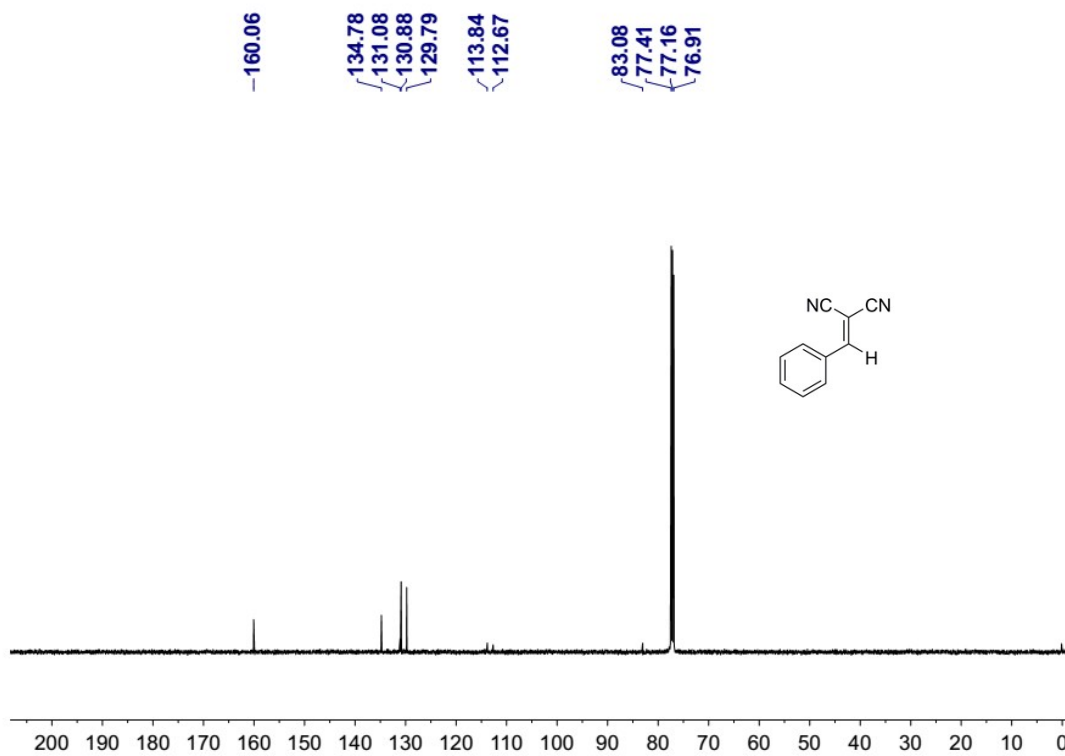

Figure S8. <sup>13</sup>C NMR spectrum of 2-benzylidenemalononitrile (entry 1) in CDCl<sub>3</sub>.



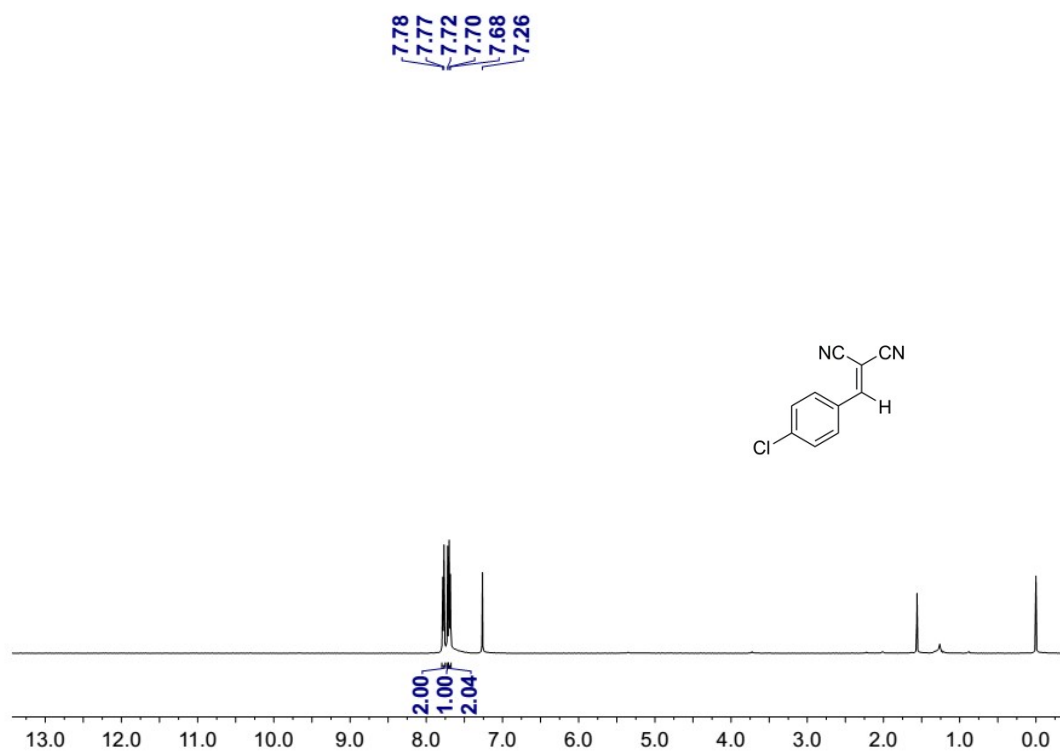

Figure S9. <sup>1</sup>H NMR spectrum of 2-(4-chlorobenzylidene)malononitrile. (entry 2) in CDCl<sub>3</sub>.

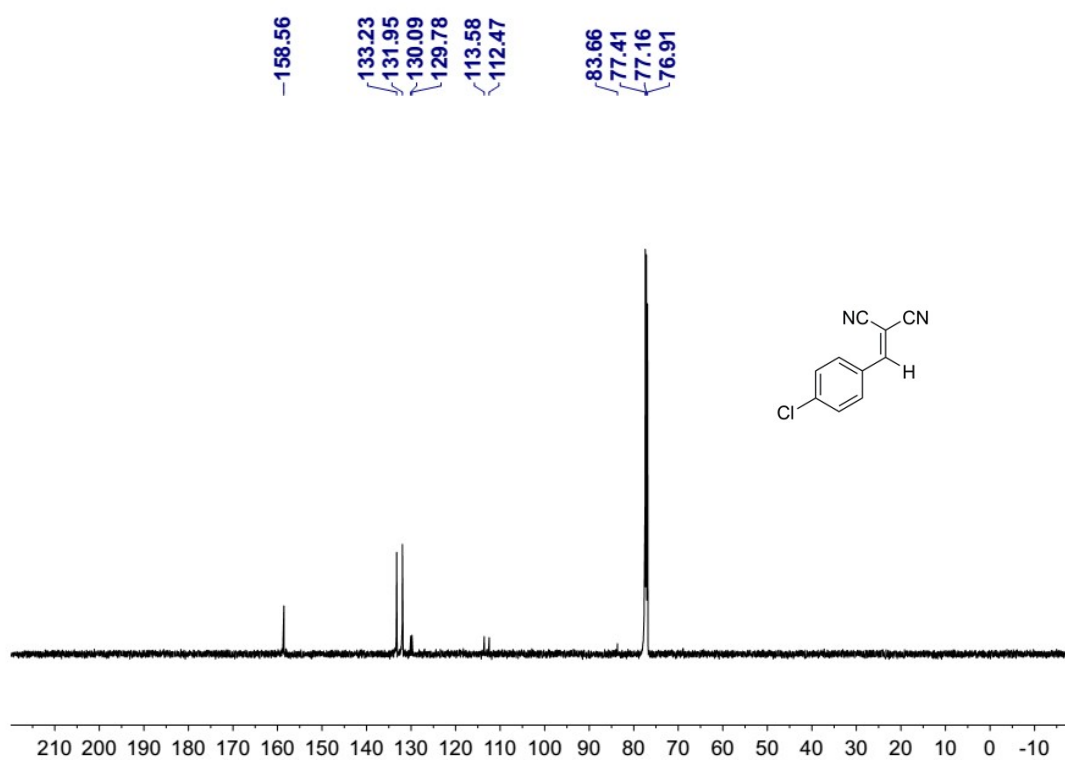

Figure S10. <sup>13</sup>C NMR spectrum of 2-(4-chlorobenzylidene)malononitrile (entry 2) in CDCl<sub>3</sub>.

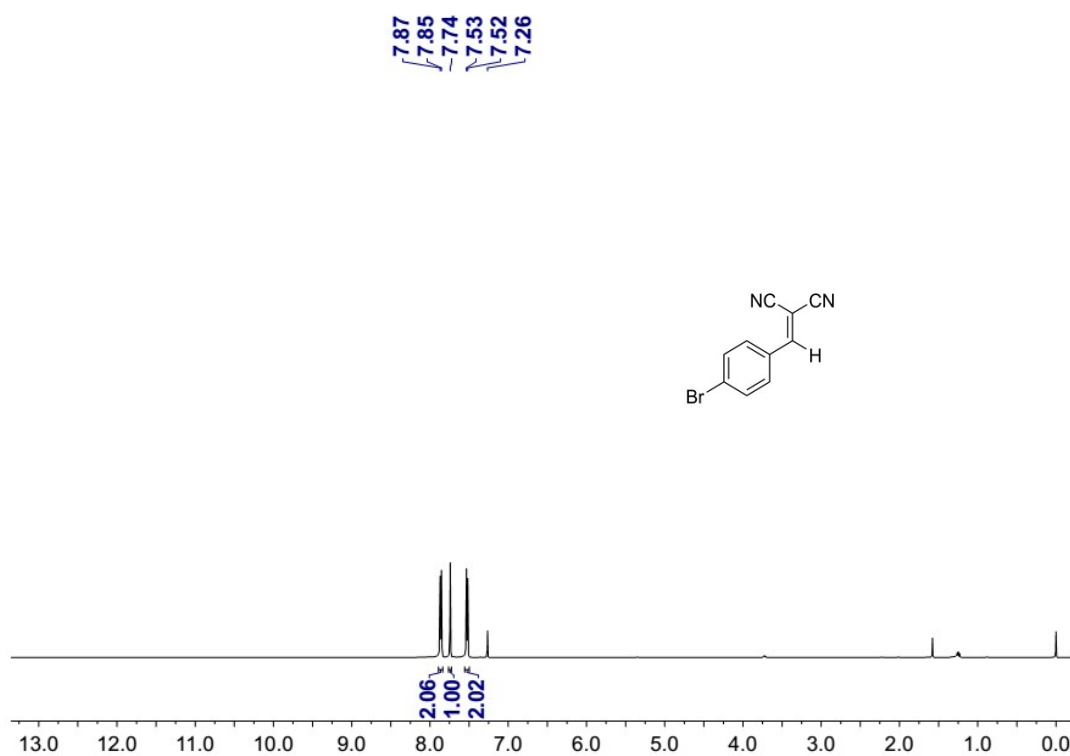

Figure S11. <sup>1</sup>H NMR spectrum of 2-(4-bromobenzylidene)malononitrile(entry 2) in CDCl<sub>3</sub>.

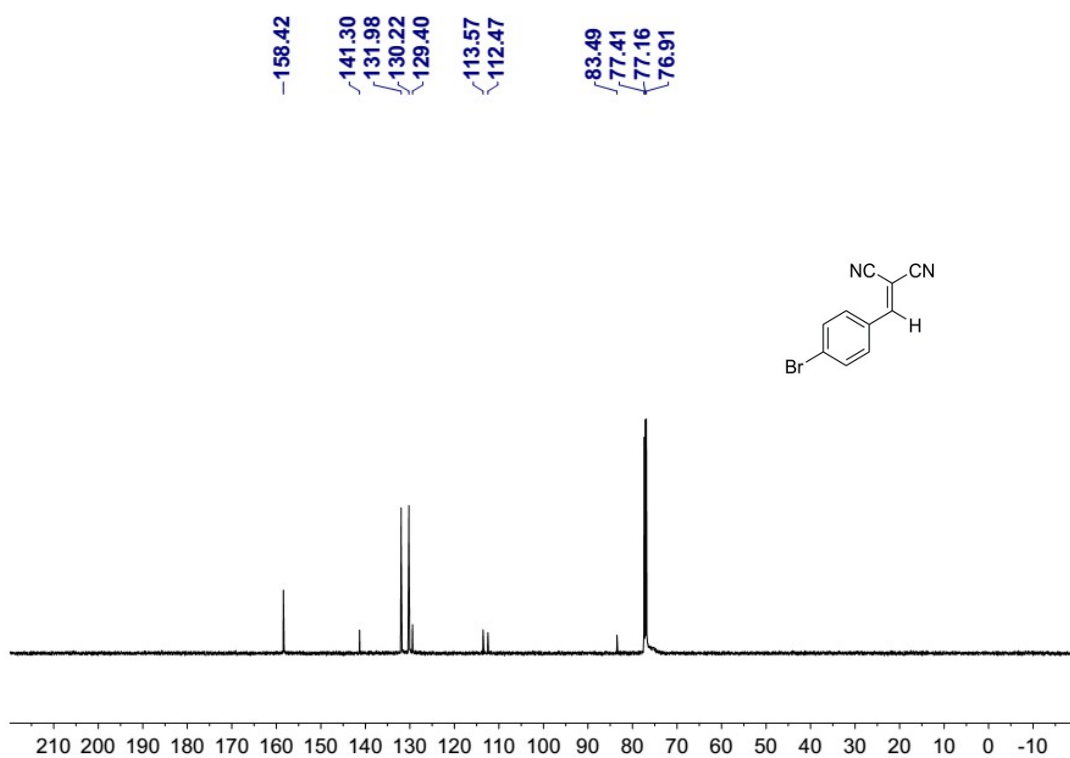

Figure S12. <sup>13</sup>C NMR spectrum of 2-(4-bromobenzylidene)malononitrile(entry 3) in CDCl<sub>3</sub>.

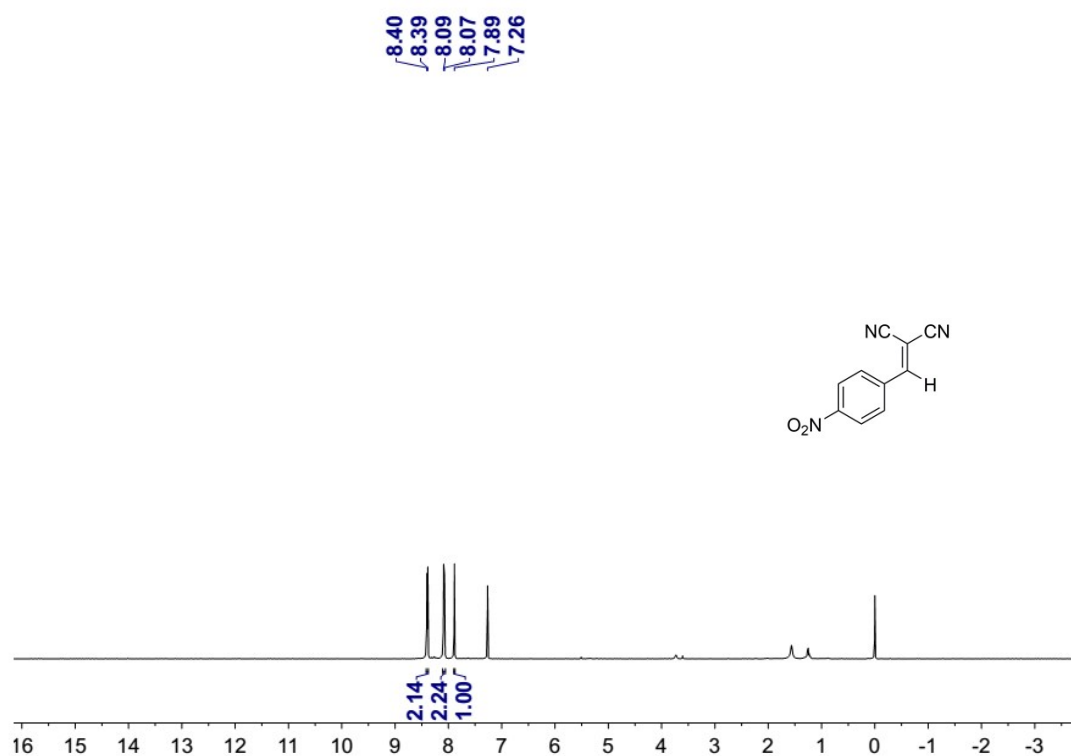

Figure S13. <sup>1</sup>H NMR spectrum of 2-(4-nitrobenzylidene)malononitrile (entry 4) in CDCl<sub>3</sub>.

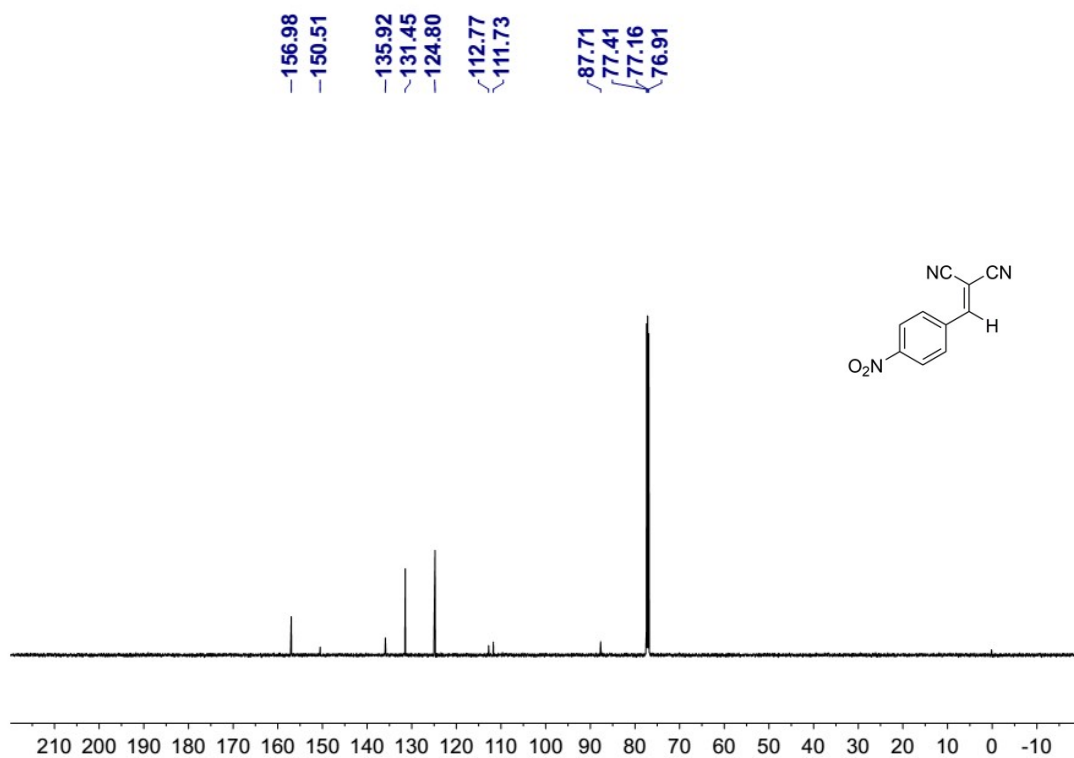

Figure S14. <sup>13</sup>C NMR spectrum of 2-(4-nitrobenzylidene)malononitrile (entry 4) in CDCl<sub>3</sub>.

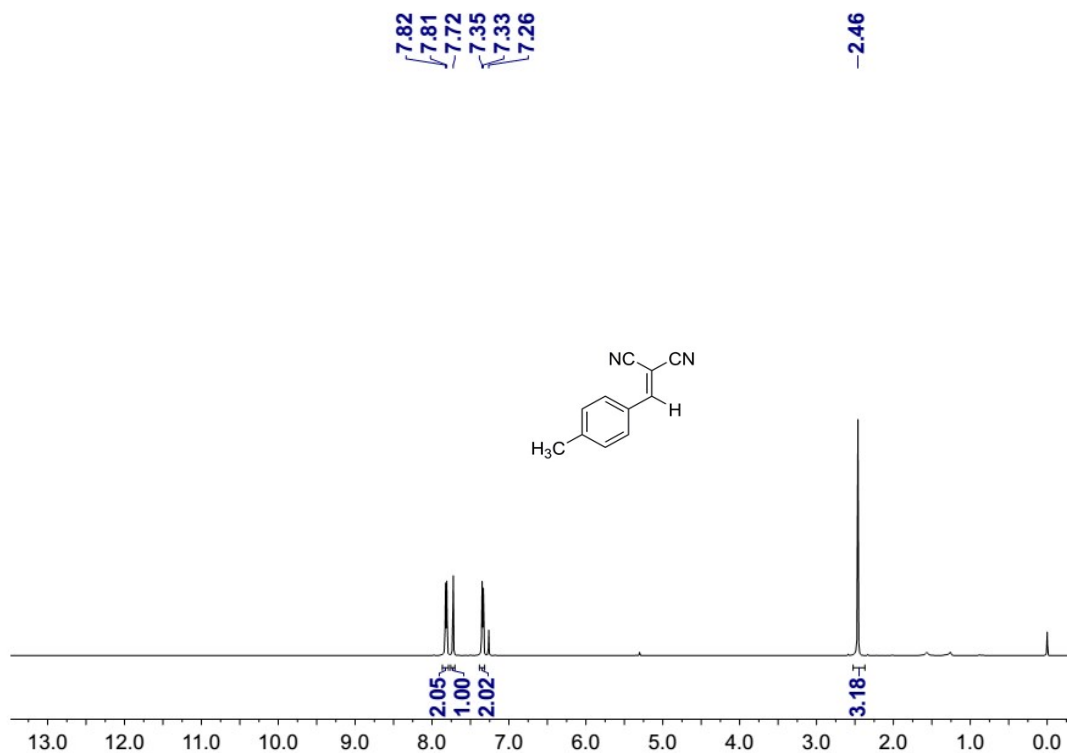

Figure S15. <sup>1</sup>H NMR spectrum of 2-(4-methylbenzylidene)malononitrile (entry 5) in CDCl<sub>3</sub>.

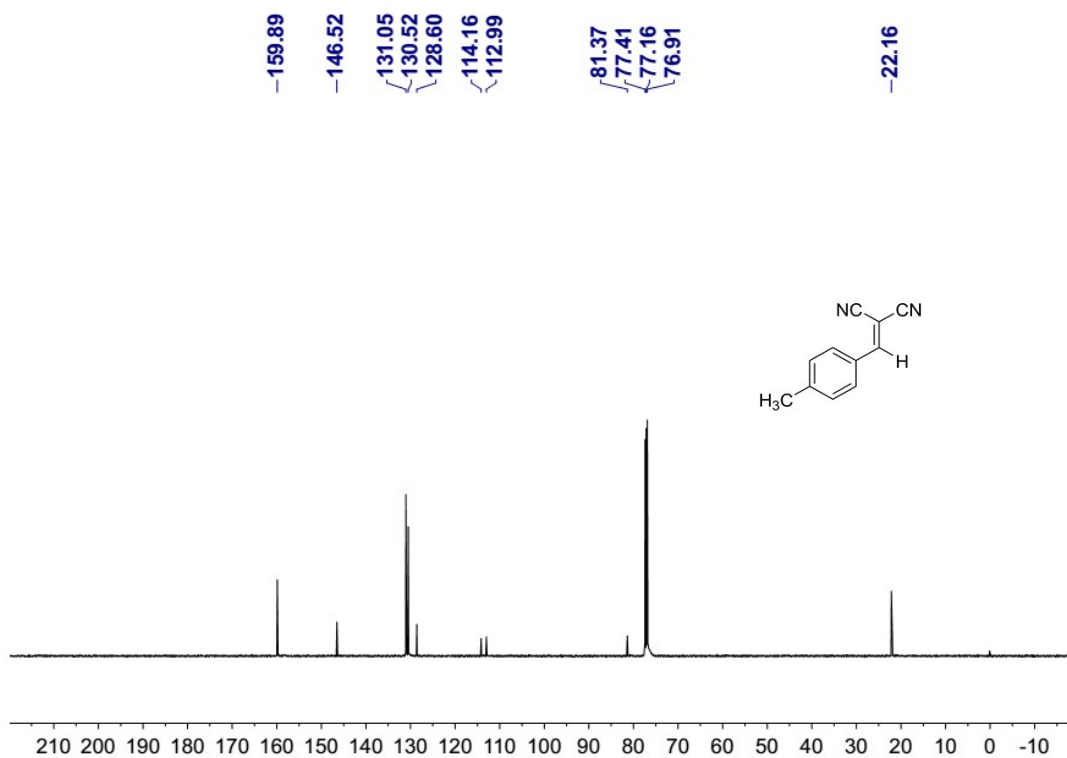

Figure S16. <sup>13</sup>C NMR spectrum of Entry 2-(4-methylbenzylidene)malononitrile (entry 5) in CDCl<sub>3</sub>.

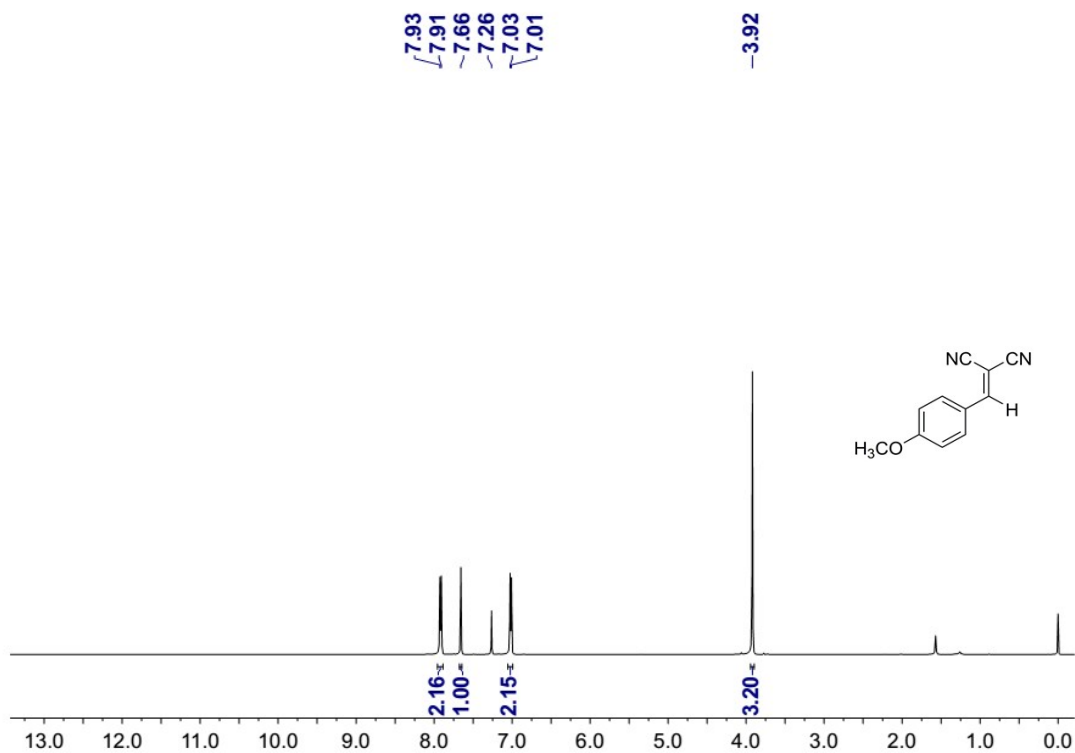

Figure S17.  $^1\text{H}$  NMR spectrum of 2-(4-methoxybenzylidene)malononitrile (entry 6) in  $\text{CDCl}_3$ .

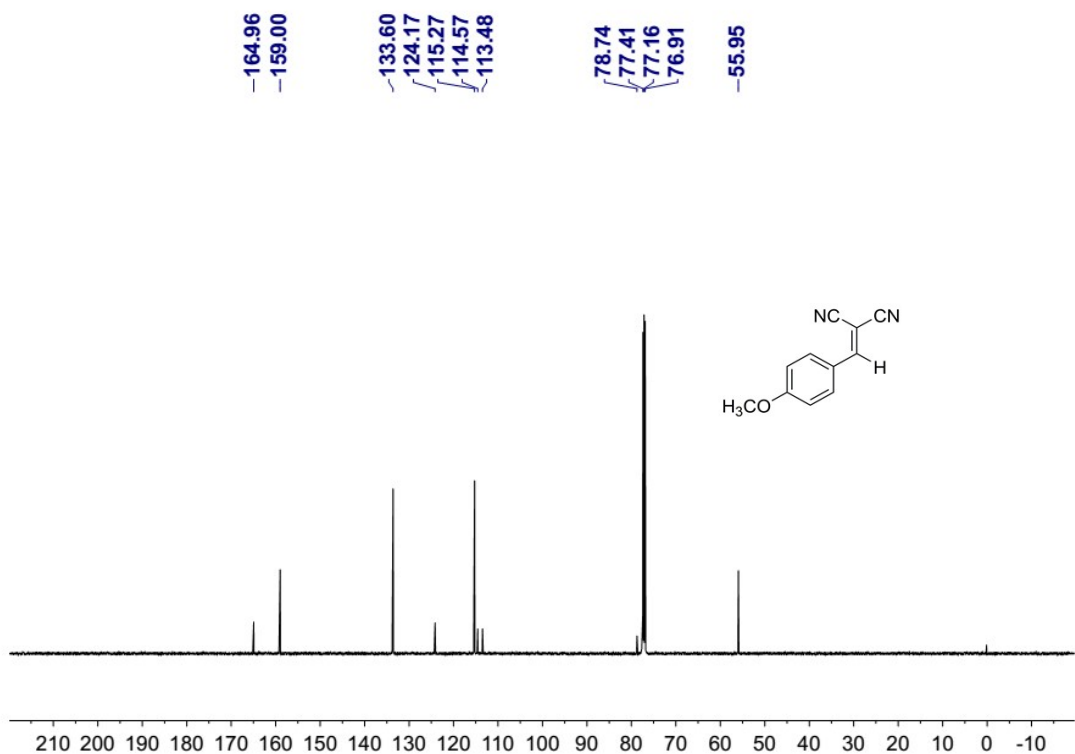

Figure S18.  $^{13}\text{C}$  NMR spectrum of 2-(4-methoxybenzylidene)malononitrile (entry 6) in  $\text{CDCl}_3$ .

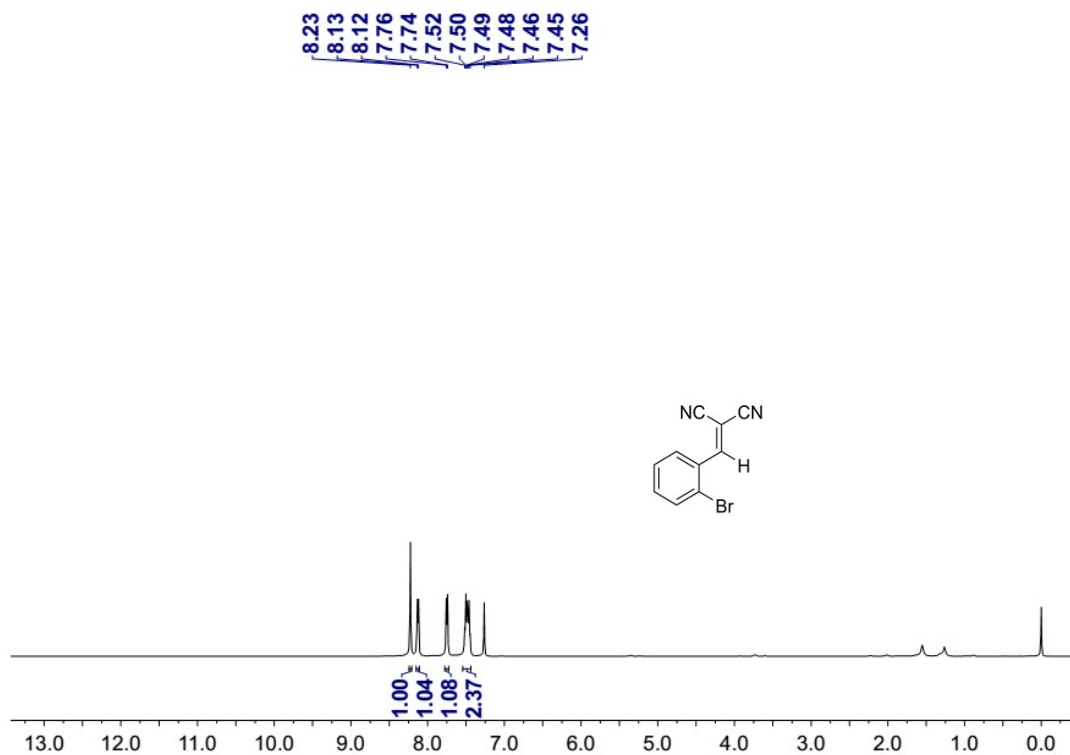

Figure S19.  $^1\text{H}$  NMR spectrum of 2-(2-bromobenzylidene)malononitrile (entry 7) in  $\text{CDCl}_3$ .

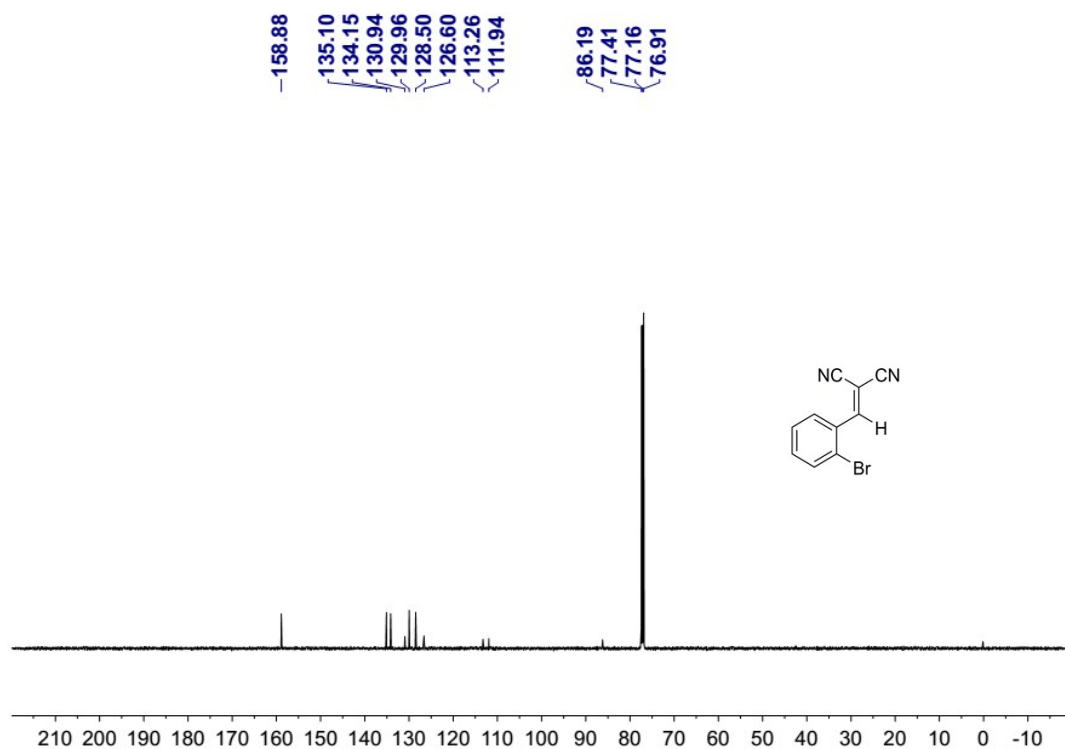

Figure S20.  $^{13}\text{C}$  NMR spectrum of 2-(2-bromobenzylidene)malononitrile (entry 7) in  $\text{CDCl}_3$ .

## References

- (1) L. Shiri, H. Narimani, M. Kazemi, *Appl. Organomet. Chem.*, 2018, **32**, 3927.
- (2) H. Sarvari, M. Sharghi, H.E. Samane, *Chin. J. Chem.*, 2007, **25**, 1563.
- (3) S. Patai, Z. Rappoport, *J. Chem. Soc.*, 1962, 383.
- (4) P. S. Rao, R. V. Venkataratnam, *Tetrahedron Lett.*, 1991, **32**, 5821.
